# Supplementary material
Source: PubMed Central journal article supplement (PMC5675443)
Supplement: develop-144-148684-s1.pdf [file develop-144-148684-s1.pdf]

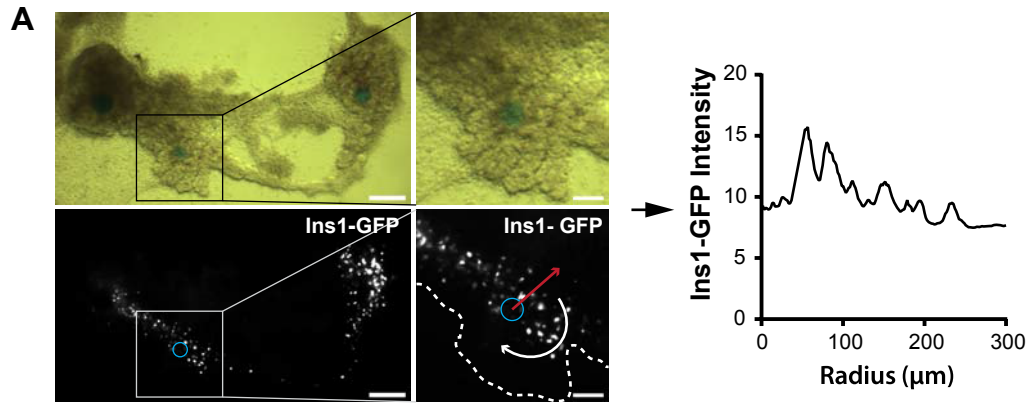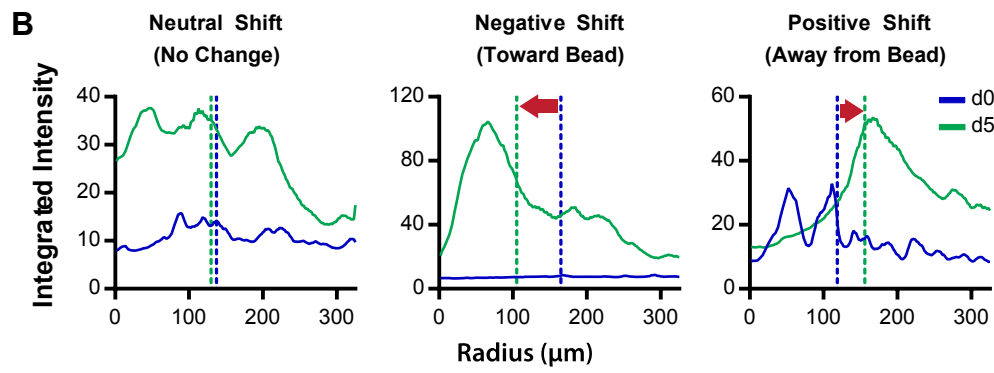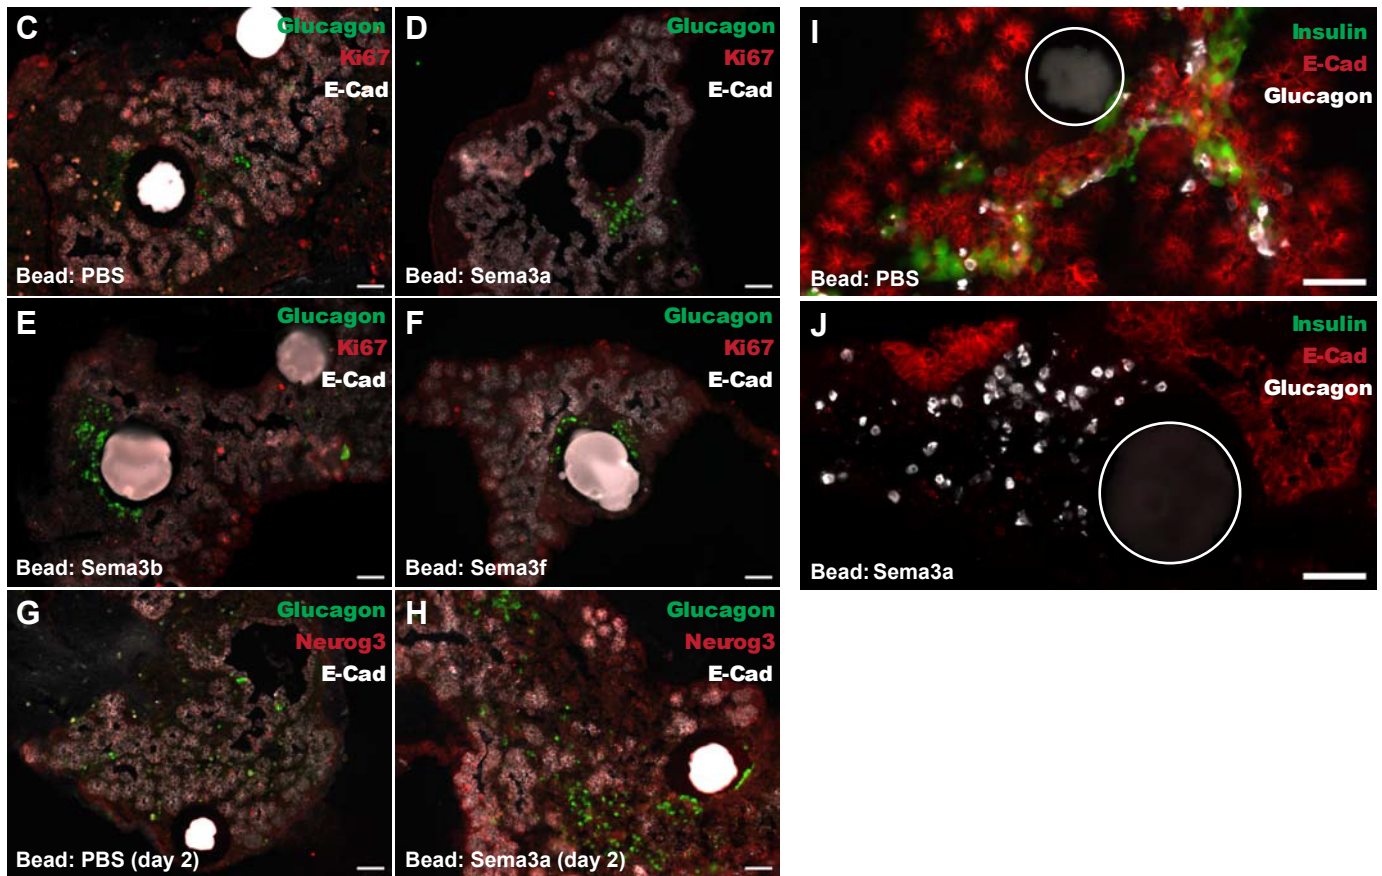

**Figure S1. Supplemental data related to bead screen.** (A) Description of methods used for screening candidate growth factors and quantifying changes in  $\beta$  cell position over time. Growth factor-soaked agarose beads (blue) were implanted into E13.5 fetal mouse pancreatic organ cultures. *Ins1*-GFP fluorescence was measured as a function of radius from the central bead; lower right fluorescence image indicates measurement of *Ins1*-GFP intensity along a line (red arrow) rotated  $360^\circ$  (white arrow) from the center of the bead (blue circle). Fluorescence intensity was measured along the circumference of each circle with radius from 0 to 325  $\mu\text{m}$  and normalized for path length, with resulting chart indicated at right. (B) Examples of Shift calculations for three organs. Blue line indicates day 0 measurements; green line indicates day 5 measurements. The center of the bead is defined as radius = 0  $\mu\text{m}$ . (C-F) Sema3a, Sema3b, and Sema3f are capable of inducing alpha cell swarming of beads in the distal dorsal pancreas. None induce expression of Ki67 in alpha cells. (G,H) No alteration of islet precursor marker Neurog3 expression with Sema3a bead. (I,J) Alpha cells responding to Sema3a beads invade into mesenchyme and lose E-Cadherin expression. White circles indicate bead placement. Scale bars: 100  $\mu\text{m}$  (A, C-H) and 50  $\mu\text{m}$  (I,J).

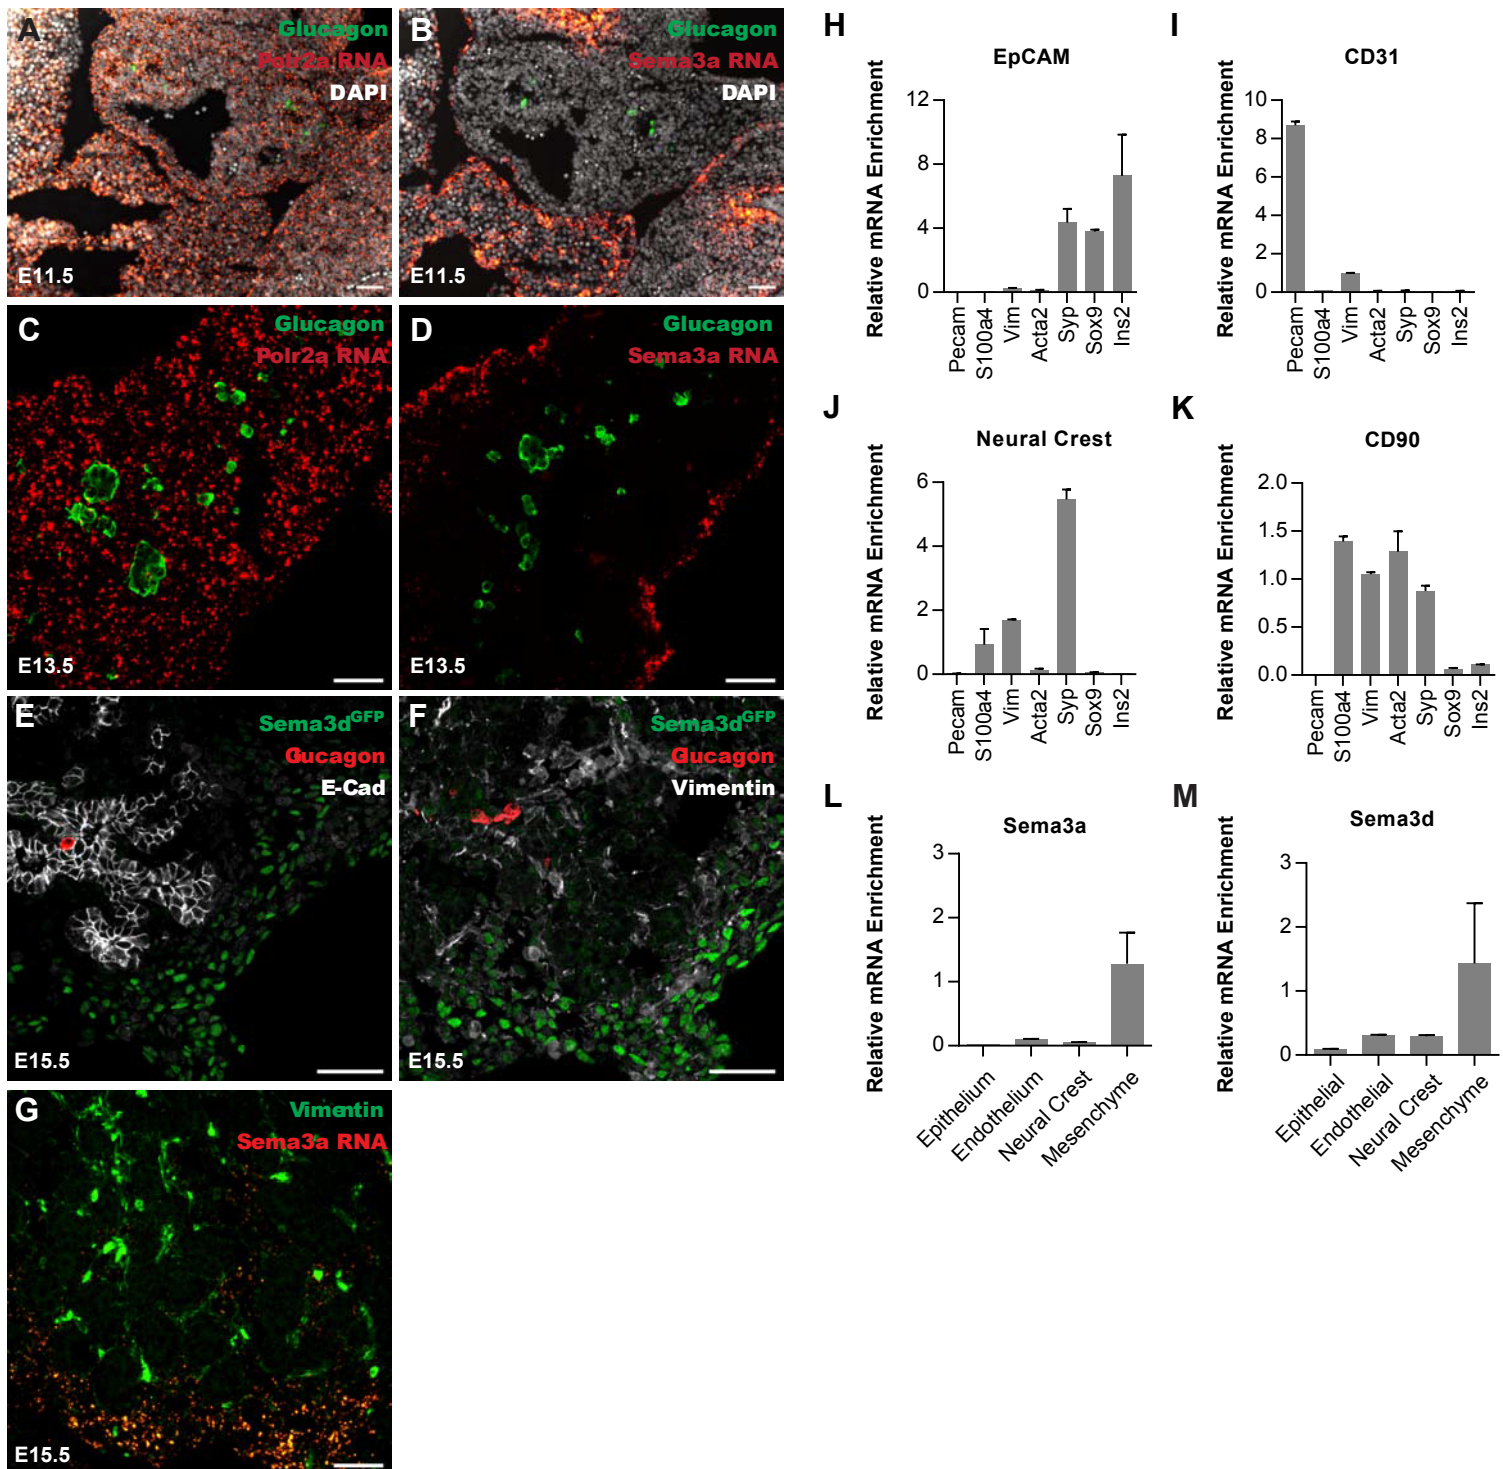

**Figure S2. Supplemental data related to Semaphorin expression.** (A-D) *Sema3a* mRNA is expressed along the pancreatic periphery at earlier developmental stages, including E11 and E13. (E,F) Expression of *Sema3d*<sup>GFP</sup> transgene is restricted to peripheral pancreatic mesenchymal cells. (G) *Sema3a* mRNA expression overlaps with peripheral mesenchymal cells. (L-M) *Sema3a* and *Sema3d* mRNA are enriched in FACS-purified mesenchymal cells; validation of FACS purified cell populations are presented (H-K). Data in (H-M) presented as mean±SEM. Scale bars: 50 μm.

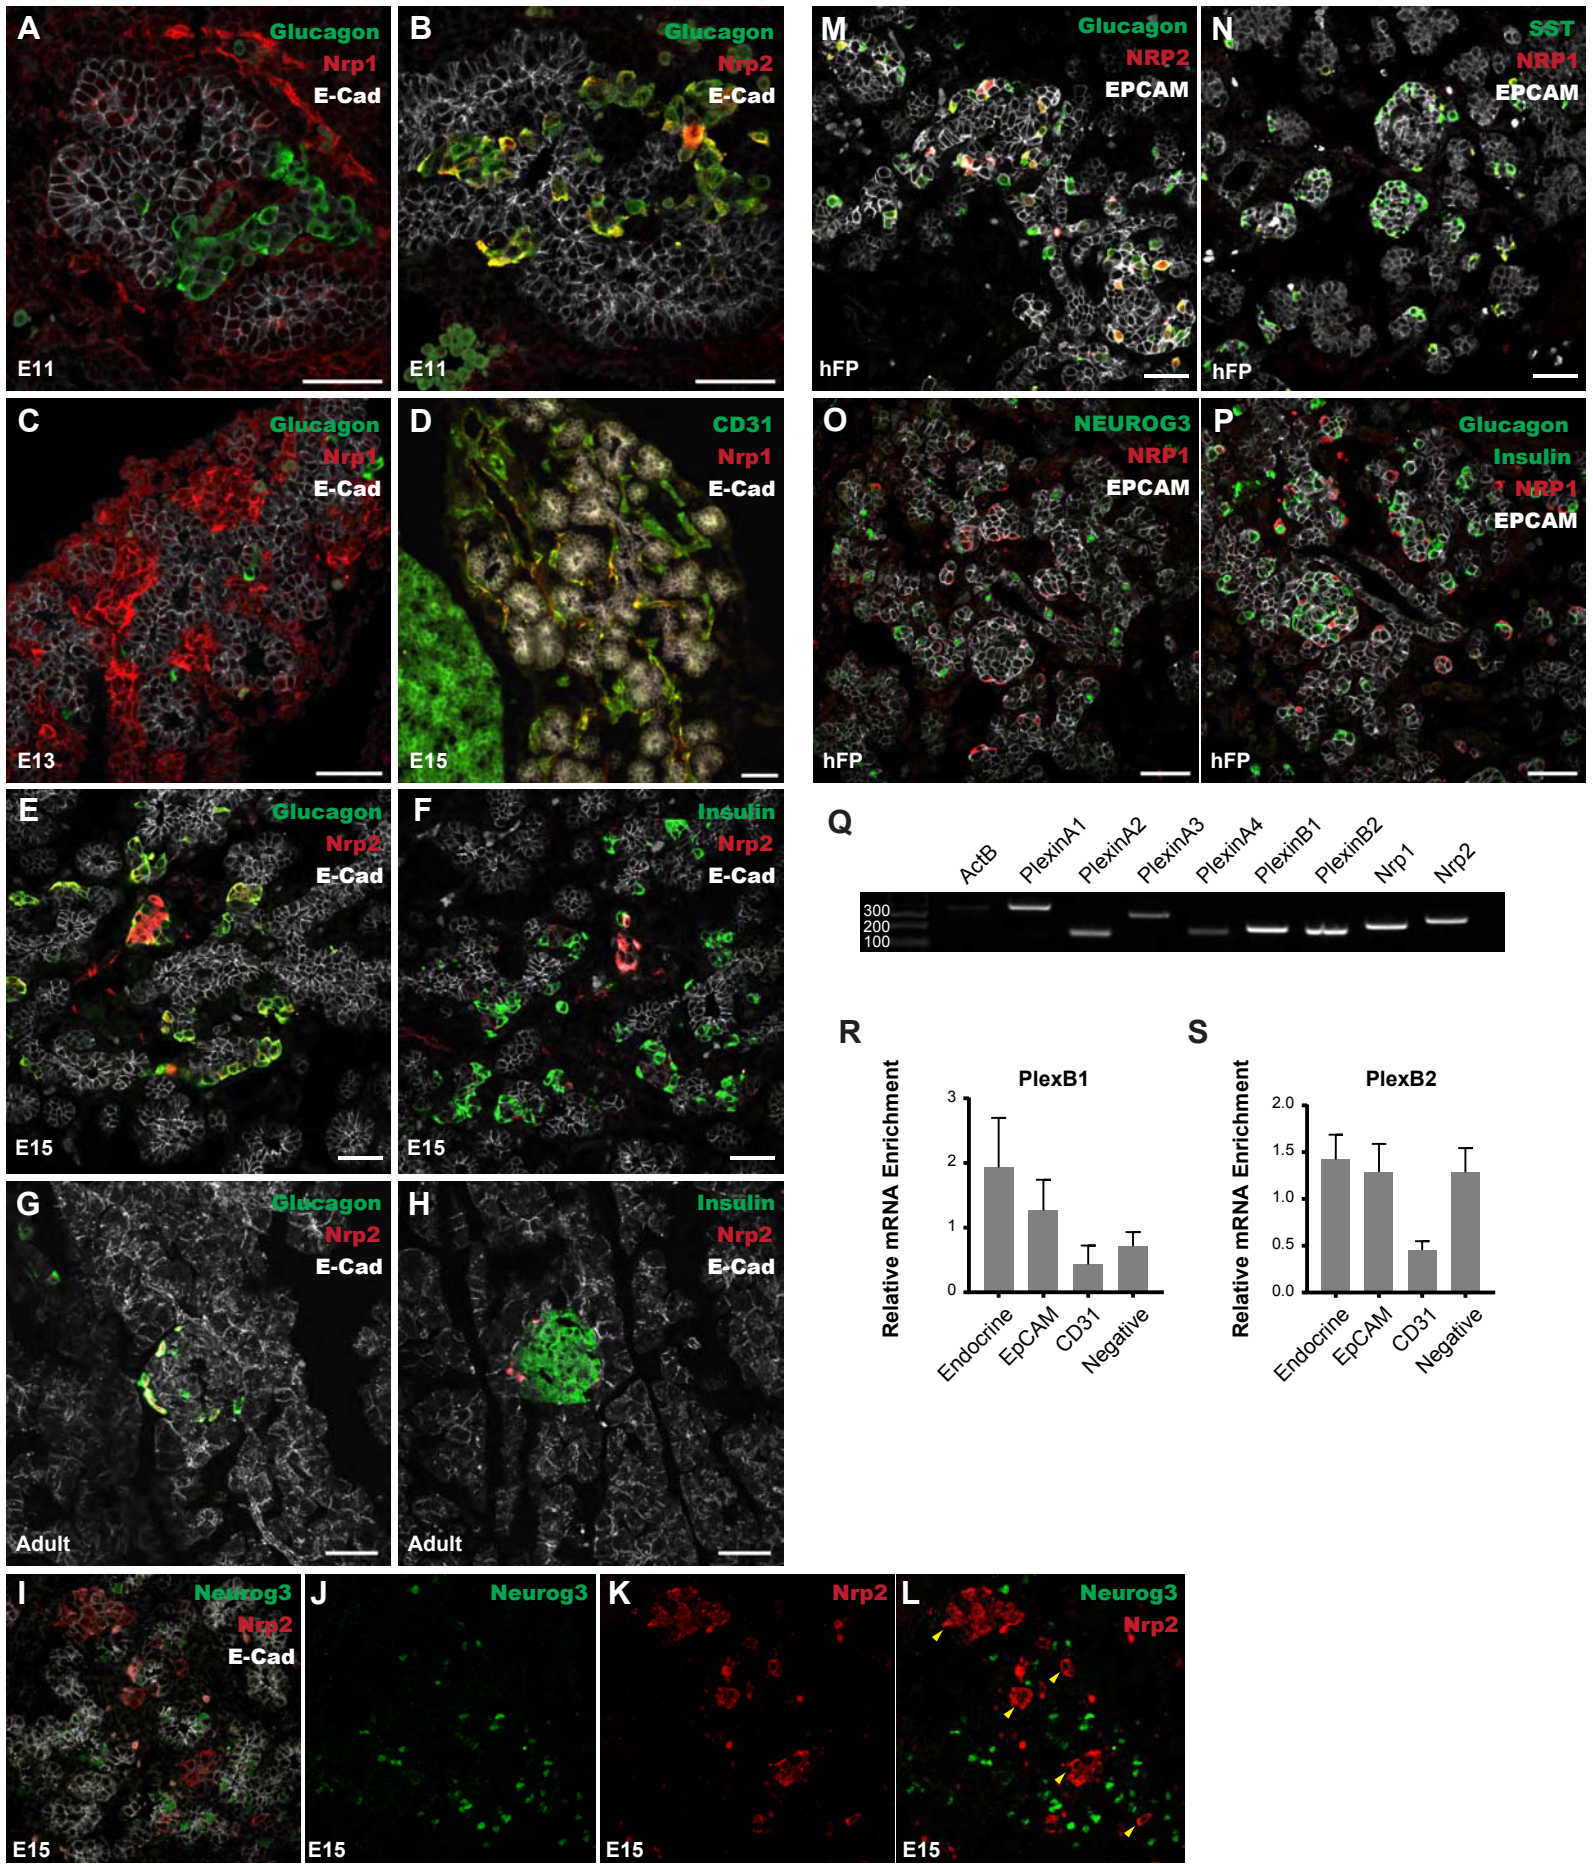

**Figure S3. Expression of Semaphorin receptors in the pancreas.** (A,B) At E11.5, Nrp1 is expressed within the pancreatic epithelium but not in  $\alpha$  cells. Nrp2 is expressed in  $\alpha$  cells. (C) Nrp1 is expressed primarily in the mesenchyme at E13.5, and in a subset of epithelial cells. (D) Expression of Nrp1 at E15.5 overlaps with CD31<sup>+</sup> endothelial cells. (E-H) Nrp2 is expressed in  $\alpha$  cells, but not  $\beta$  cells, at E15.5 and in adult mice. (I-L) Nrp2 is not expressed in islet progenitor cells, marked by Neurogenin 3<sup>+</sup> signal, at e15. (M-P) In the human fetal pancreas, NRP2 is expressed in  $\alpha$  cells, and NRP1 is expressed in  $\delta$  cells. NRP1 is also expressed in a subset of EPCAM<sup>+</sup> epithelial cells that does not coexpress NEUROG3, Insulin, or Glucagon. (Q) Expression of Plexin mRNA by RT-PCR in E15.5 pancreas. (R,S) Expression of *PlexinB* genes in FACS-purified cell populations shows a lack of enrichment in islet cells at E15.5 relative to EpCAM<sup>+</sup> epithelial cells or whole pancreas. Data presented as mean $\pm$ SEM. Scale bars: 50  $\mu$ m.

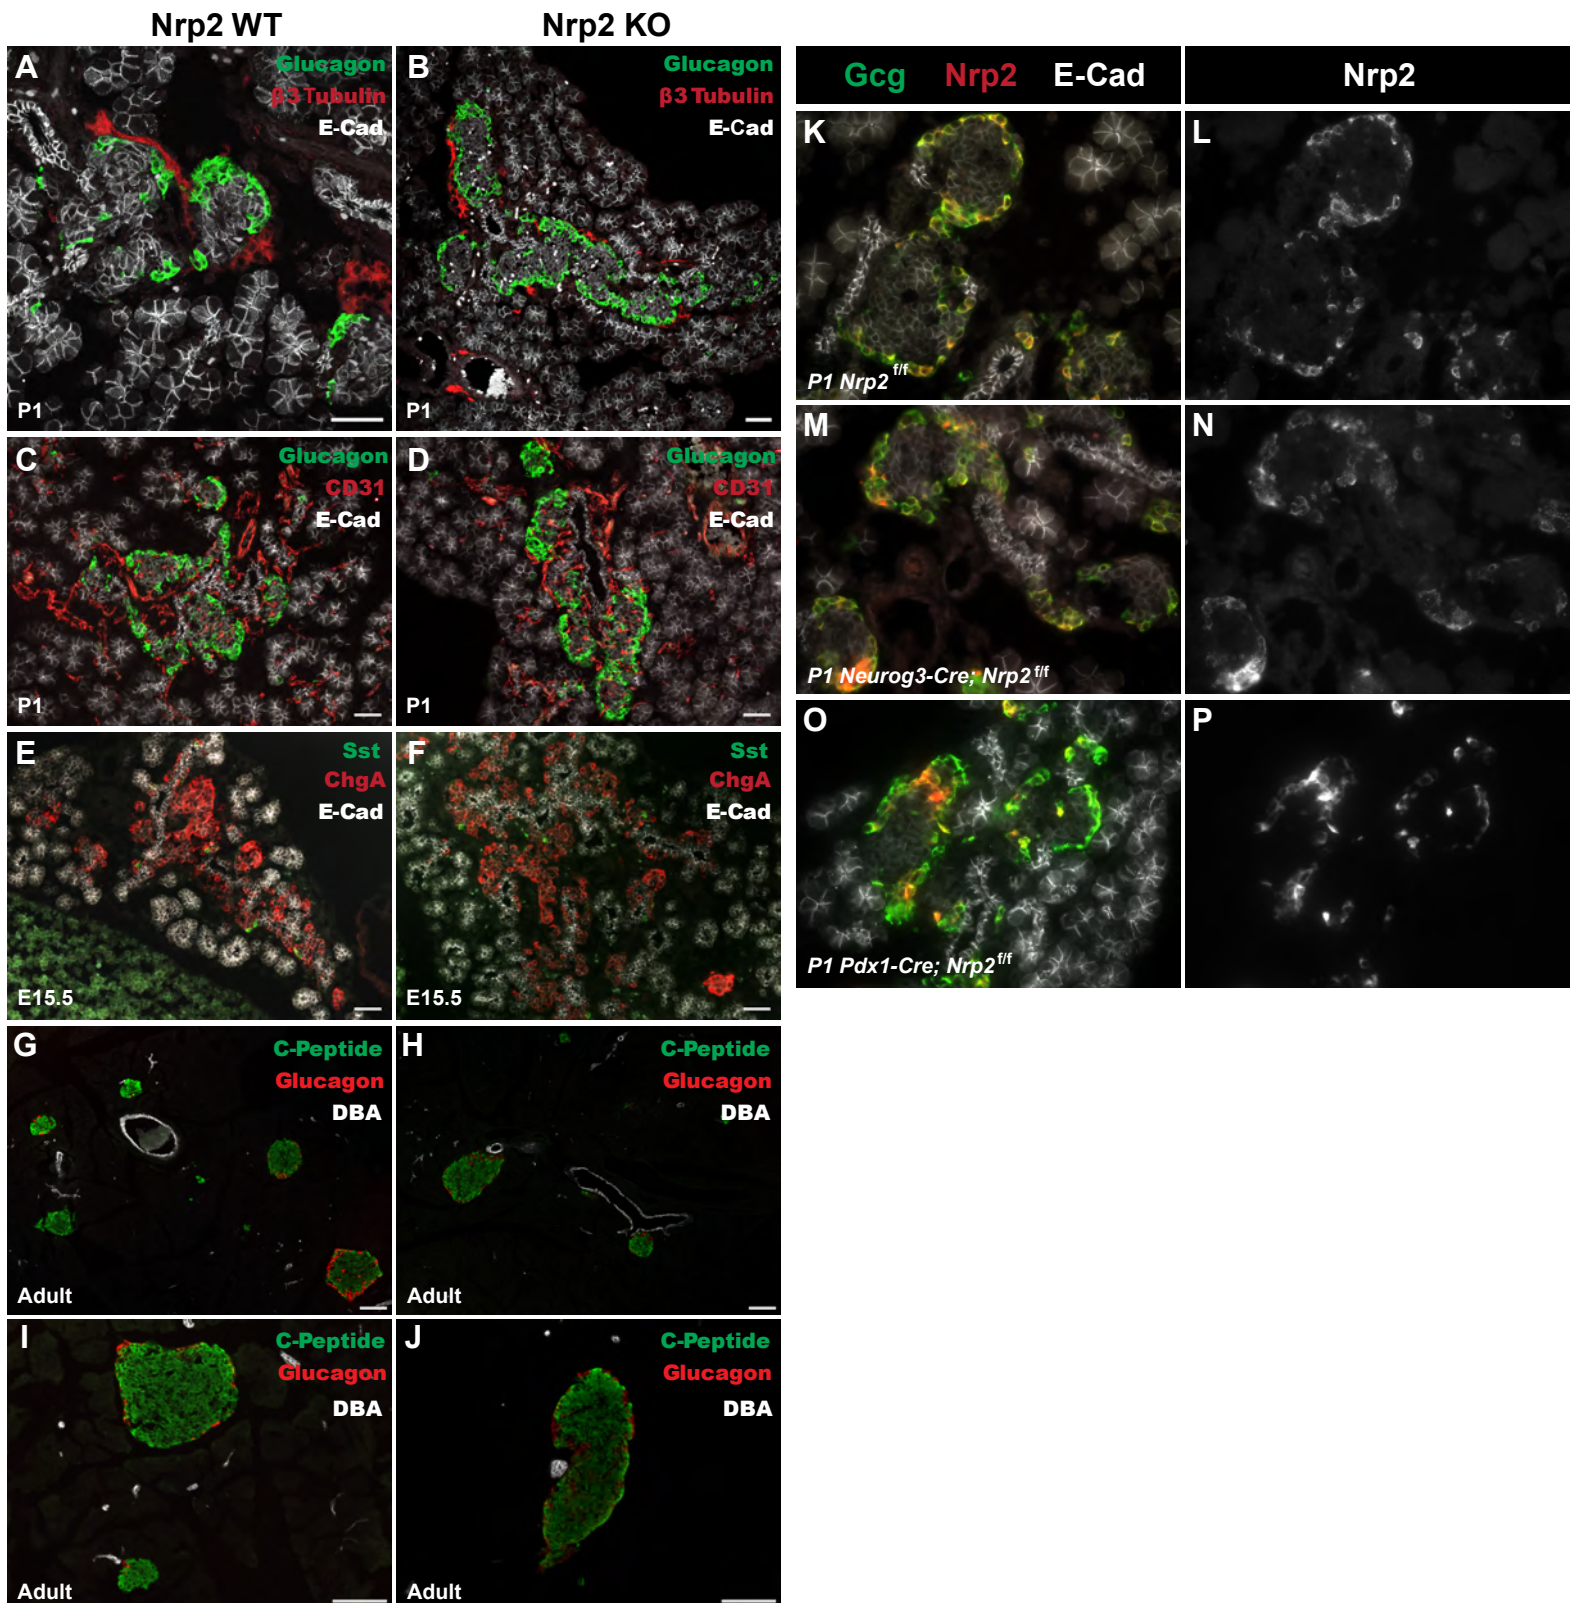

**Figure S4. Supplemental data related to *Nrp2* knockout analysis.** (A-D) No gross alterations in islet innervation or vascularization at P1. (E,F) No apparent changes in  $\delta$  cell development at E15.5. (G-J) Islet histology in surviving adult *Nrp2* knockout mice demonstrates islet association with ducts. (K-P) The *Nrp2* floxed allele is not efficiently excised by pancreas specific Ngn3 cre and Pdx1 cre transgenes at P0. Scale bars: 50  $\mu$ m.

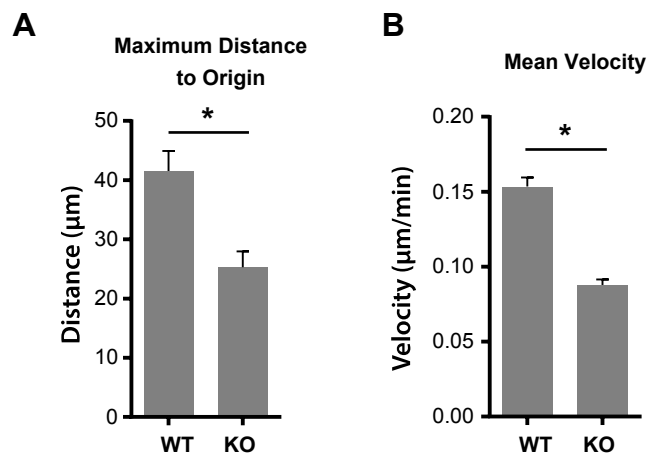

**Figure S5. Live imaging analysis supplement.** (A) Quantification of maximum distance from cell position at  $t=0$  hrs in live imaging of *Nrp2* wild-type and knockout cells ( $P=0.001$ ,  $n = 38$  WT and 25 KO). (B) Quantification of mean cell velocity in live imaging ( $P=2 \times 10^{-11}$ ,  $n = 38$  WT and 25 KO). Both presented as mean  $\pm$  SEM,  $P$  values from two-tailed t-test.

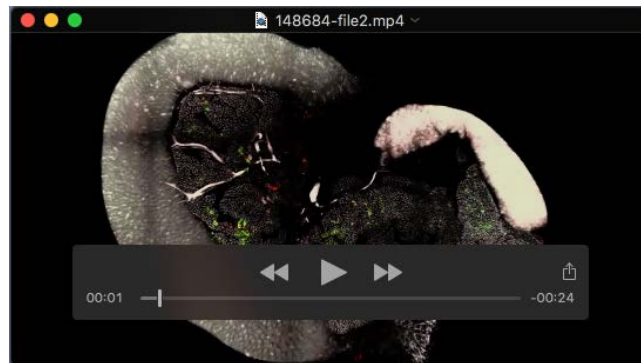

**Movie 1. CLARITY 3D reconstruction of *Nrp2* wild type whole pancreas at P1.** Islets (glucagon, red; c-peptide, green) in *Nrp2* wild type pancreas form distinct small islet clusters both close and distant to ductal structures (mucin, white). The 3D reconstruction movies were created in Arivis Vision4D software using data from Figure 4.

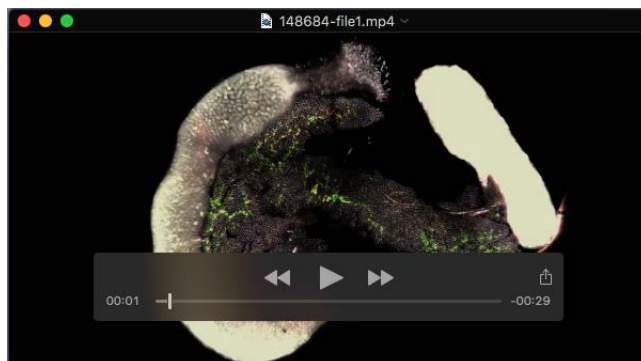

**Movie 2. CLARITY 3D reconstruction of *Nrp2* knockout type whole pancreas at P1.** Islets (glucagon, red; c-peptide, green) in *Nrp2* knockout type pancreas form distinct small islets clusters, but also form large islet aggregates that are in close proximity to ductal structures (mucin, white). The 3D reconstruction movies were created in Arivis Vision4D software using data from Figure 4.



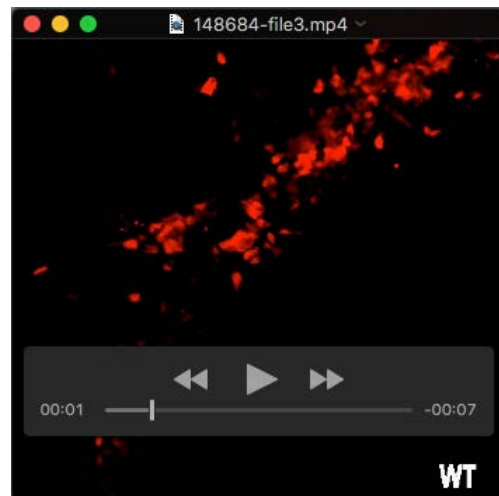

**Movie 3. 24 hour time-lapse video of endocrine cell migration and deformation in *Nrp2* wild type embryonic pancreas explant.** Endocrine lineage cells (red) in *Nrp2* wild type pancreas (*Nrp2*<sup>+/+</sup>; Neurog3-tdTomato) readily display cell migration and cell deformation, such as filopodia extensions. Time-lapse video is created from data in Figure 5.

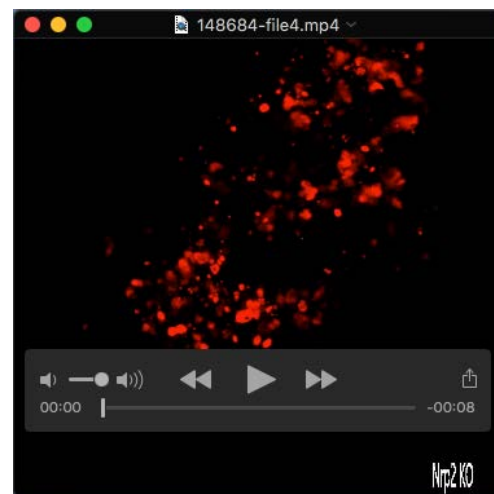

**Movie 4. 24 hour time-lapse video of endocrine cell migration and deformation in *Nrp2* knockout embryonic pancreas explant.** Endocrine lineage cells (red) in *Nrp2* knockout pancreas (*Nrp2*<sup>-/-</sup>; Neurog3-tdTomato) show limited migration and cell deformation compared to *Nrp2* wild type control (Movie S3). Time-lapse video is created from data in Figure 5.

## Supplemental Tables

| <b>Table S1. Growth factors used in bead screen</b> |                |                       |                             |
|-----------------------------------------------------|----------------|-----------------------|-----------------------------|
| <b>Growth factor</b>                                | <b>Company</b> | <b>Catalog Number</b> | <b>n (organs in screen)</b> |
| PDGF-BB (human recombinant)                         | R&D Systems    | 220-BB-010            | 3                           |
| BMP4 (human recombinant)                            | R&D Systems    | 314-BP-010            | 6                           |
| Noggin (human recombinant)                          | R&D Systems    | 6057-NG-025           | 5                           |
| HGF (human recombinant)                             | R&D Systems    | 294-HG-005            | 5                           |
| Activin A (human recombinant)                       | R&D Systems    | 338-AC-010            | 5                           |
| GDF3 (human recombinant)                            | R&D Systems    | 5754-G3-010           | 7                           |
| IGF1 (human recombinant)                            | R&D Systems    | 291-G1-200            | 3                           |
| TGF $\beta$ 1 (human recombinant)                   | R&D Systems    | 240-B-002             | 5                           |
| Sema3a (human recombinant, Fc fusion)               | R&D Systems    | 1250-S3-025           | 6                           |
| TGF $\beta$ 3 (human recombinant)                   | R&D Systems    | 243-B3-002            | 6                           |
| VEGF (human recombinant)                            | Peprtech       | AF-100-20A            | 7                           |
| Wnt3a (mouse recombinant)                           | R&D Systems    | 1324-WN-002           | 4                           |
| EGF (human recombinant)                             | Sigma          | E9644                 | 4                           |
| RSPO1 (human recombinant)                           | Peprtech       | 120-38                | 5                           |
| Shh (human recombinant)                             | Peprtech       | 315-22                | 3                           |
| Cxcl13 (mouse recombinant)                          | Peprtech       | 250-24                | 4                           |
| Cxcl12 (mouse recombinant)                          | R&D System     | 460-SD-010            | 6                           |
| Fgf2 (human recombinant)                            | Peprtech       | 100-18B               | 5                           |
| Exendin4                                            | Tocris         | 1933                  | 3                           |
| Ang1 (human recombinant)                            | Peprtech       | 130-06                | 3                           |
| sFRP1 (human recombinant)                           | Peprtech       | 120-29                | 3                           |
| Sema3a (mouse recombinant, Fc fusion)               | R&D Systems    | 5926-S3-025           | N/A                         |
| Sema3b (mouse recombinant, Fc fusion)               | R&D Systems    | 5440-S3-025           | N/A                         |
| Sema3f (mouse recombinant, Fc fusion)               | R&D Systems    | 3237-S3-025           | N/A                         |

| Inhibitor                     | Concentration | Company           | Catalog Number |
|-------------------------------|---------------|-------------------|----------------|
| CHIR99021 (GSK3 inhibitor)    | 1 $\mu$ M     | Selleck Chemicals | S2924          |
| LIMKi3 (LIM Kinase inhibitor) | 10 $\mu$ M    | EMD Millipore     | 435930         |
| IPA3 (PAK inhibitor)          | 10 $\mu$ M    | EMD Millipore     | 506106         |
| Y-27632 (ROCK inhibitor)      | 10 $\mu$ M    | EMD Millipore     | 688000         |
| Roscovitine (CDK5 inhibitor)  | 10 $\mu$ M    | EMD Millipore     | 557360         |

| Antigen        | Antibody type                                               | Source                      | Catalog number | Dilution |
|----------------|-------------------------------------------------------------|-----------------------------|----------------|----------|
| Insulin        | Guinea pig polyclonal                                       | Dako                        | A0564          | 500      |
| c-Peptide      | Rabbit polyclonal                                           | Cell Signaling Technologies | 4593           | 500      |
| Glucagon       | Guinea pig polyclonal                                       | Clontech                    | M182           | 5,000    |
| Chromogranin A | Rabbit polyclonal                                           | Immunostar                  | 20085          | 500      |
| E-Cadherin     | Rat monoclonal                                              | Life Technologies           | 13-1900        | 500      |
| Mucin          | Hamster monoclonal                                          | Thermo Scientific           | HM-1630        | 500      |
| Nrp1           | Rabbit monoclonal (EPR3113)                                 | Abcam                       | ab81321        | 250      |
| Nrp2           | Rabbit monoclonal (D39A5)                                   | Cell Signaling Technologies | 3366           | 250      |
| Vimentin       | Rabbit monoclonal (D21H3)                                   | Cell Signaling Technologies | 5741           | 200      |
| PDGFRA         | Rabbit monoclonal (D1E1E)                                   | Cell Signaling Technologies | 3174           | 400      |
| CD90 (AF488)   | Rat monoclonal (30-H12)                                     | BioLegend                   | 105315         | 250      |
| EpCAM (Biotin) | Mouse monoclonal (G8.8)                                     | BioLegend                   | 118204         | 250      |
| CD31 (BV421)   | Mouse monoclonal (390)                                      | BioLegend                   | 102423         | 250      |
| EPCAM          | Mouse monoclonal (1B7)                                      | eBioscience                 | 13-9326        | 250      |
| DBA            | ( <i>Dolichos biflorus agglutinin</i> lectin, biotinylated) | Vector Laboratories         | B-1035         | 1000     |

\*All antibodies were validated using positive and negative control tissue samples.

| Gene     | Forward Primer Sequence   | Reverse Primer Sequence    | Product Size |
|----------|---------------------------|----------------------------|--------------|
| ActB     | CATAGCACAGCTTCTCTTTGATGTC | CTAAGGCCAACCGTGAAAAGATG    | 321 bp       |
| PlexinA1 | TCAATGACAAAGTTGCCATTCCAC  | AAATACCGCCATGTTTGCACC      | 350 bp       |
| PlexinA2 | TGAGATGGTCTCTGTGTTCAAAGAT | GATCCCCTGAGCTTAGACACTCT    | 167 bp       |
| PlexinA3 | CTGTTGGATACTGTGTACAAGGGTA | GCTATCCGGGCTGCTGG          | 301 bp       |
| PlexinA4 | CACAATGGGGGTCACCTGAG      | AAATGCCCTCCAATATGAGACTGT   | 188 bp       |
| PlexinB1 | ATGCTGGGGAGTATGATGTCTCTA  | GAGCTTAGAACCATGCAGGGTAA    | 214 bp       |
| PlexinB2 | GCAGTCATAGAAGGGATACTGGTG  | GACTGAGGACGATGAGTTACTGTG   | 206 bp       |
| Nrp1     | GGCCCTTCTCTTCATCAAATTTGT  | CTCCAGGTCAAACCTTTCAAACCTCC | 214 bp       |
| Nrp2     | TACATCAAGTTCACCTCAGACTACG | CAGCCAGTCATATTTACAGTCTCCT  | 254 bp       |
